# Supplementary material for: In situ fabricated nickel vanadate/N-doped reduced graphene oxide hybrid as an advanced electrocatalyst in alkaline hydrogen evolution reaction
Source: Royal Society of Chemistry journal article supplement (doi:10.1039/c9ta02884f), 2019-01-01
Supplement: c9ta02884f1.pdf [file c9ta02884f1.pdf]

**Electronic Supplementary Information**

***In situ* fabricated nickel vanadate/N-doped reduced graphene oxide hybrid  
as an advanced electrocatalyst in alkaline hydrogen evolution reaction**

Ayon Karmakar<sup>a</sup> and Suneel Kumar Srivastava<sup>\*ab</sup>

*<sup>a</sup>Inorganic Materials and Nanocomposite Laboratory, Department of Chemistry, Indian Institute of  
Technology Kharagpur, Kharagpur 721302, India.*

*<sup>b</sup>School of Energy Science and Engineering, Indian Institute of Technology Kharagpur, Kharagpur  
721302, India.*

\*E-mail: [sunil111954@yahoo.co.uk](mailto:sunil111954@yahoo.co.uk)

## **Experimental section**

### **Materials**

Sulphuric acid ( $\text{H}_2\text{SO}_4$ ), phosphoric acid ( $\text{H}_3\text{PO}_4$ ), potassium permanganate ( $\text{KMnO}_4$ ), hydrogen peroxide ( $\text{H}_2\text{O}_2$ ), hydrochloric acid ( $\text{HCl}$ ), nickel chloride hexahydrate ( $\text{NiCl}_2 \cdot 6\text{H}_2\text{O}$ ), urea ( $\text{CO}(\text{NH}_2)_2$ ), ethylene glycol ( $\text{C}_2\text{H}_6\text{O}_2$ ) and pure graphite powder (Micro 850 grade) were procured from Merck India and Asbury Carbons respectively. In addition, potassium hydroxide ( $\text{KOH}$ ), ammonium metavanadate ( $\text{NH}_4\text{VO}_3$ ) and Pt/C (20 wt.%) were purchased from SRL Chemicals and Sigma-Aldrich respectively. All these reagents were analytical grade and used without further purification. Distilled water was used throughout all the experiments.

### **Synthesis of Graphene Oxide**

Graphene oxide (GO) was prepared by modified Hummers' method.<sup>1</sup> In this method, 0.5 gm graphite flakes was added to in a 500 mL beaker containing the mixture of concentrated  $\text{H}_2\text{SO}_4/\text{H}_3\text{PO}_4$  (9:1, v/v, 70 ml) maintained on an ice bath followed by continuous stirring for 15 min. Subsequently, 1.5 gm of  $\text{KMnO}_4$  (3 equivalent) was slowly added and the mixture was stirred for another 1 hr. After 1 hr, 40 mL of cold water was added very slowly to the previous mixture at room temperature. This is followed by the addition of 240 mL hot distilled water and stirred for 40 min. Subsequently, 5 mL of  $\text{H}_2\text{O}_2$  was added to the earlier mixture and further stirred for 30 minutes. The product obtained in this manner was washed by  $\text{HCl}$  solution (5%) followed by distilled water until the pH of the supernatant liquid becomes neutral and finally dried at 60 °C in an air oven for 2 days.

### **Fabrication of Nickel Vanadate/NRGO Hybrid**

40 mg GO was dispersed ultrasonically for 1 hour in 60 mL mixed solvent (water/Ethylene glycol:1/1) in a 250 mL round bottom flask (RB) and then centrifuged to remove the unexfoliated portions. Subsequently, 3 mmol  $\text{NiCl}_2 \cdot 6\text{H}_2\text{O}$  was added to the previous

exfoliated GO dispersion. Following this, earlier dispersion was magnetically stirred for 1 h in order to achieve good electrostatic attachment between negatively charged GO and  $\text{Ni}^{2+}$  ions. Subsequently, 2 mmol  $\text{NH}_4\text{VO}_3$  dissolved in 20 mL mixed solvent was added to earlier dispersion maintained at room temperature. Thereafter, 12 mmol urea was added to this and subjected to stirring for 30 min and refluxed in an oil-bath at  $\sim 140^\circ\text{C}$  for 6 h. After cooling down naturally, pH of the mixture was found to be  $\sim 9$  and precipitate formed at the bottom of RB was filtered, washed several times with water/ethanol and dried at  $60^\circ\text{C}$  for 12 h. Finally, brownish powdered product obtained in this manner was collected and referred as NV/NRGO2. In addition, two more samples were prepared in the same fashion by varying the amount of GO, named NV/NRGO1 (using 20 mg GO) and NV/NRGO3 (using 60 mg GO). The pure nickel vanadate (NV) was also fabricated in absence of GO following the similar procedure for comparing its electrochemical performance with earlier prepared hybrid samples. Further, NRGO, NV/RGO, NiO, and  $\text{V}_2\text{O}_5$  were also fabricated and the fabrication procedures are described below.

### **Preparation of NRGO**

NRGO was prepared in a similar manner as  $\text{Ni}_3\text{V}_2\text{O}_8/\text{NRGO}$  hybrids in absence of nickel and vanadium sources and keeping all other reaction parameters unchanged.

### **Preparation of $\text{Ni}_3\text{V}_2\text{O}_8/\text{RGO}$ hybrid**

$\text{Ni}_3\text{V}_2\text{O}_8/\text{RGO}$  (NV/RGO) hybrid was fabricated in the same fashion as described for NV/NRGO2 in absence of urea and other parameters remained unaltered. The pH of the final reaction mixture was adjusted to 9 by dropwise addition of 0.5 (M) NaOH before subjecting to reflux.

### **Preparation of NiO**

5 mmol  $\text{NiCl}_2 \cdot 6\text{H}_2\text{O}$  dissolved in 60 mL mixed solvent (water/Ethylene glycol:1/1) in a 250 mL RB and 12 mmol urea was dissolved in another 20 mL mixed solvent. Subsequently, both these two solutions were mixed together and refluxed in an oil-bath at  $\sim 140^\circ\text{C}$  for 6 h. Thereafter, the reaction mixture was cooled naturally to room temperature and the light green colored precipitate was filtered, washed and dried at  $60^\circ\text{C}$  for 12 h. Further, the precipitate was calcined at  $400^\circ\text{C}$  for 2 h in air and final black colored powdered product was collected.

### **Preparation of $\text{V}_2\text{O}_5$**

In order to prepare  $\text{V}_2\text{O}_5$ , 5 mmol  $\text{NH}_4\text{VO}_3$  dissolved in 80 mL mixed solvent (water/Ethylene glycol:1/1) at  $80^\circ\text{C}$  and a pale yellow colored solution was obtained. Subsequently, 12 mmol urea was added to the above solution and the final solution was refluxed at  $140^\circ\text{C}$  for 12 h. Then the reaction mixture was cooled down to room temperature and precipitate formed at bottom was filtered, washed and dried at  $60^\circ\text{C}$ . The dried product was calcined at  $500^\circ\text{C}$  for 2 h in a muffle furnace in air atmosphere and golden yellow colored powders were collected as the final product.

### **Characterization Techniques**

X-ray diffraction (XRD) of the samples were carried out on Bruker D8 Advance with  $\text{Cu K}\alpha$  radiation in the scan ranges of  $2\theta = 10^\circ\text{--}70^\circ$ . Thermogravimetric analysis was performed on a Q20 thermogravimetric analyzer (TA Instruments) in the temperature range of  $30\text{--}800^\circ\text{C}$  at a heating rate of  $10^\circ\text{C min}^{-1}$  in air atmosphere. Carl-Zeiss MERLIN field emission scanning electron microscopy (FESEM), FEI-TECNAI-G2 Transmission electron microscopy (TEM) and JEOL JEM-2100F scanning transmission electron microscopy (STEM) equipped with energy dispersive X-ray spectroscopy (EDX) were employed to identify the morphology, microstructure, and elemental composition of the prepared samples. Inductively coupled plasma mass spectrometry was conducted using an iCAP Q ICP-MS (Thermo Scientific).

Raman analyses were carried out in an Optical Microscope BX41 (Olympus, Japan) T64000 (Jobin Yvon Horiba, France) spectrometer equipped with argon-krypton mixed ion gas laser 2018 RM (Spectra Physics, USA) at an excitation wavelength of 514.5 nm in the frequency range of 200–2000  $\text{cm}^{-1}$ . X-ray photoelectron spectroscopy (XPS) of the samples were examined using PHI 5000 Versa Probe II (ULVAC–PHI, INC, Japan) coupled with a micro-focused (100  $\mu\text{m}$ , 25 W, 15 kV) monochromatic Al  $K\alpha$  source ( $h\nu = 1486.6 \text{ eV}$ ).

### Electrochemical characterization

The working electrode ( $\sim 1.0 \text{ cm}^2$ ) is prepared by coating slurry on a Ni-foil (NF). For this purpose, NF was initially cleaned using 6 M HCl, water, and ethanol while subjecting it to sonication for 10 min and dried at  $60^\circ \text{C}$  for 15 min in vacuum oven. Following this, it was coated with the slurry consisting of active catalyst, carbon black, and PVDF (8:1:1) in N-methyl pyrrolidone (NMP). Subsequently, electrochemical measurements of catalysts ( $\sim 1.84 \text{ mg cm}^{-2}$ ) were performed with *iR*-compensation on CHI7086E electrochemical work station (CH Instruments Inc., USA) in a standard three electrode configuration using saturated calomel electrode (SCE) from CHI, graphite sheet, and catalyst coated Ni-foil as reference, counter, and working electrode, respectively. In all these experiments, freshly prepared 1.0 M KOH was used as electrolyte. The potentials in our work are represented with respect to reversible hydrogen electrode (RHE) according to the following equation:  $E_{\text{RHE}} = E_{\text{SCE}} + 1.006$  (Fig. S1). The linear sweep voltammetry (LSV) of the samples were recorded at  $5 \text{ mV s}^{-1}$  in the potential range of  $-0.5 - 0.05 \text{ V}$  versus RHE for HER. But, prior to the LSV, catalysts were activated for HER in the above potential window by performing cyclic voltammetry (CV) measurements at a scan rate of  $50 \text{ mV s}^{-1}$  for 100 cycles. Thereafter, CV of different catalysts were performed at different scan rates ( $10\text{--}100 \text{ mV s}^{-1}$ ) in the potential range of  $0.106 - 0.206 \text{ V}$  (non-Faradic region) versus RHE to measure electrochemical double layer capacitance ( $C_{\text{dl}}$ ). The electrochemical impedance spectroscopy (EIS) was also

employed to investigate the charge transfer resistance ( $R_{ct}$ ) at -0.244 V in the frequency range of 100 kHz– $10^{-1}$  Hz with AC amplitude of 5 mV. In order to check the long term stability of the catalysts, galvanostatic measurements were performed at  $10 \text{ mA cm}^{-2}$  current density for 12 h. Subsequently, LSV was recorded before and after 1000 potential cycling in the cathodic region corresponding to HER.

### Calibration of SCE and conversion to RHE

The calibration of SCE (CHI150) with respect to RHE was performed in  $\text{H}_2$ -saturated 1.0 M KOH electrolyte using two Pt-wires as working and counter electrodes. LSV was run at a scan rate of  $5 \text{ mV s}^{-1}$  and the potential at zero current is considered as the thermodynamic potential for the hydrogen electrode reactions (Fig. S1). It is noted that,  $\text{H}_2$  purging was continued throughout the measurement. Thus, in 1.0 M KOH,  $E_{\text{RHE}} = E_{\text{SCE}} + 1.006 \text{ V}$ .

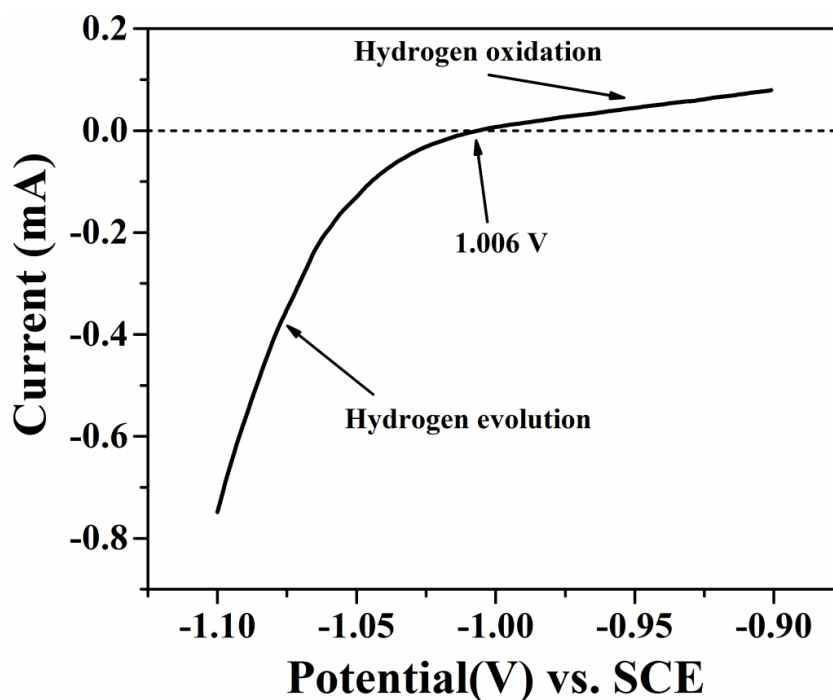

**Figure S1.** Calibration of SCE with respect to RHE.

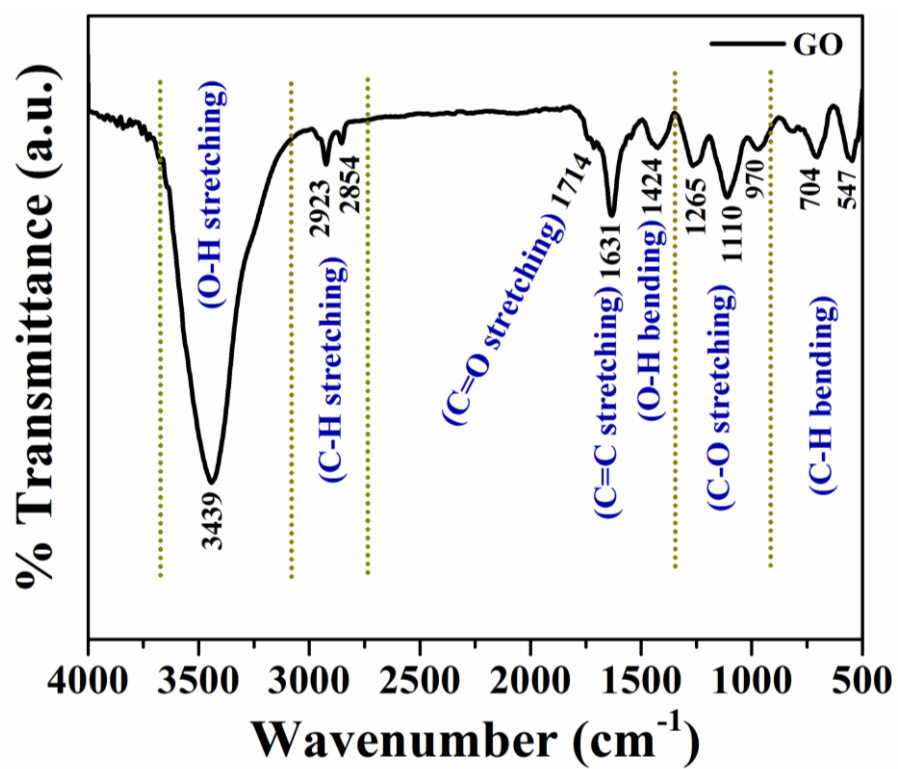

**Figure S2.** FTIR spectrum of graphene oxide (GO).

### Thermogravimetric analysis

Thermal stability behaviour of NV and composition of NV/NRGO hybrid samples has been investigated by thermogravimetric analysis (air) in the temperature range of 30–800 °C and the corresponding findings are displayed in Figure S3. All the samples underwent an initial weight loss upto ~230 °C, owing to the expulsion of interlayer/adsorbed water molecules.<sup>2,3</sup> It is noted that NV sample attain stability above ~400 °C and ~84.7 % of its initial amount remains at 800 °C. In contrast, hybrid samples showed further sharp weight loss above ~450 °C and followed the order: NV/NRGO1 < NV/NRGO2 < NV/NRGO3. In view of this, reduced graphene oxide undergoes bulk pyrolysis of carbon skeleton at 400 °C and nearly complete decomposition was observed above 500 °C in the previous reports.<sup>4</sup> Accordingly, amount of NRGO present in NV/NRGO1, NV/NRGO2, and NV/NRGO3 hybrids were calculated by considering the fact that entire NRGO has completely pyrolysed (weight loss ~100%) above 500 °C and found to be ~3.3, 5.6, and 6.6 wt.%, respectively.

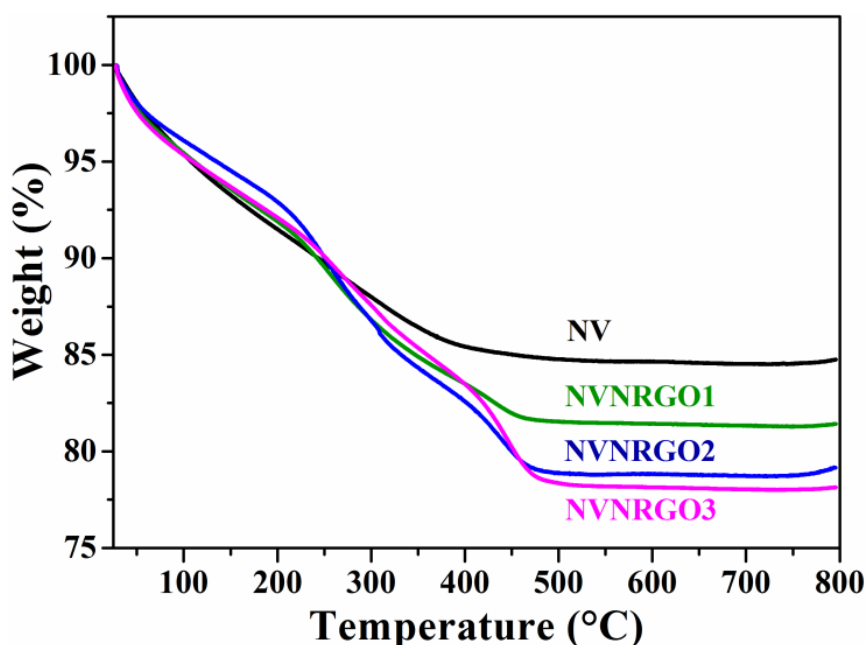

**Figure S3.** TGA curve of pure NV and NV/NRGO hybrid samples.



**Table S1.** Amount of Carbon, Hydrogen, and Nitrogen present in  $\text{Ni}_3\text{V}_2\text{O}_8@\text{NRGO}$  hybrids, obtained from CHN analysis.

| Samples  | Carbon (%) | Hydrogen (%) | Nitrogen (%) |
|----------|------------|--------------|--------------|
| NV/NRGO1 | 3.21       | 1.55         | 0.29         |
| NV/NRGO2 | 5.57       | 1.38         | 0.40         |
| NV/NRGO3 | 6.07       | 1.55         | 0.52         |

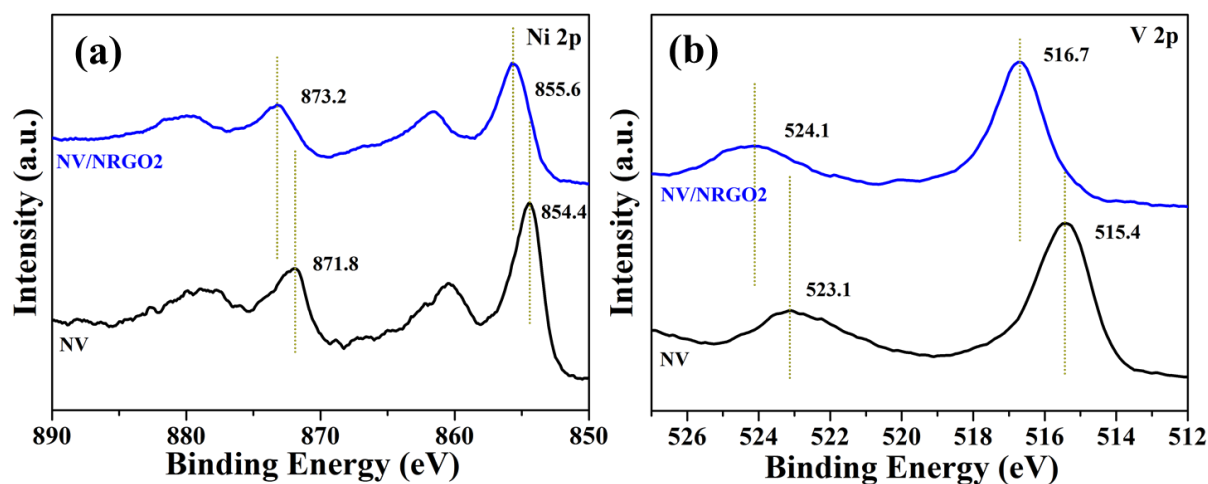

**Figure S4.** High resolution (a) Ni 2p and (b) V 2p spectra of NV and NV/NRGO2.

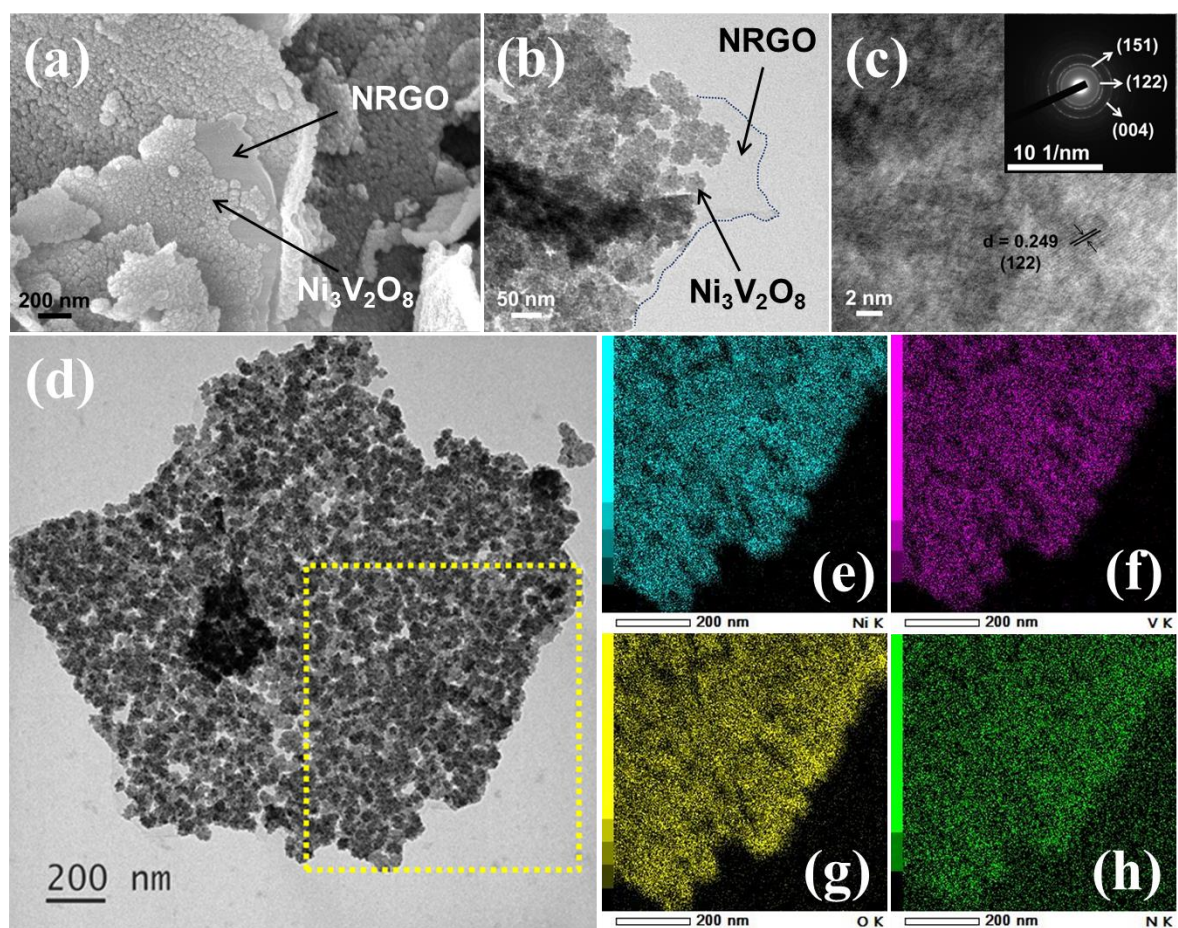

**Figure S5.** (a) FESEM, (b) TEM, and (c) HRTEM (SAED at inset), (d) STEM and corresponding (e) Ni, (f) V, (g) O, and (h) N elemental mapping images of NV/NRGO2, respectively.

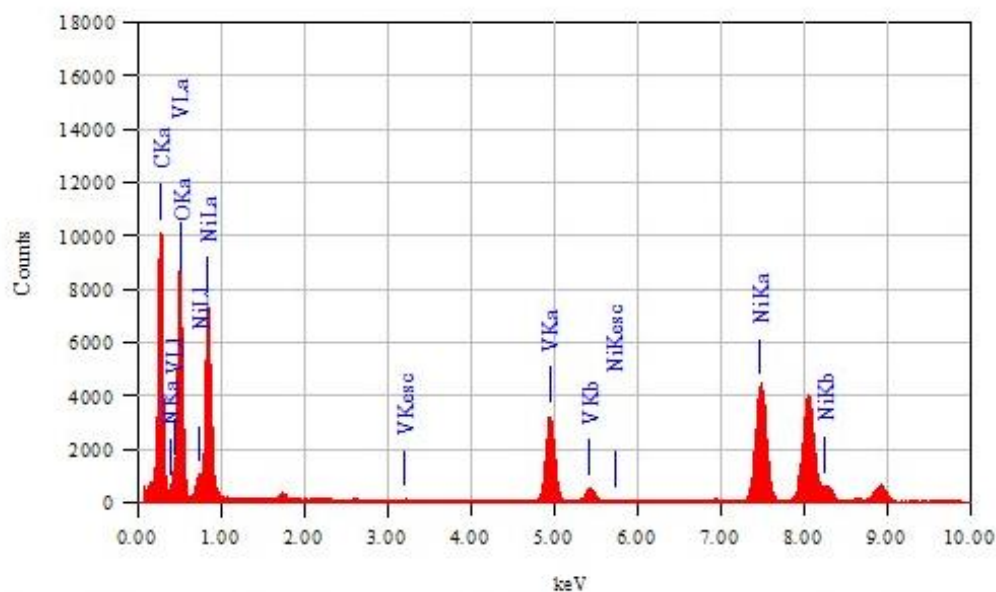

Thin Film Standardless Standardless Quantitative Analysis  
Fitting Coefficient : 0.2920

| Element     | (keV) | Mass%  | Counts   | Sigma | Atom%  | Compound |
|-------------|-------|--------|----------|-------|--------|----------|
| C K         | 0.277 | 49.82  | 52506.79 | 0.18  | 72.24  |          |
| N K         |       | ND     |          |       | ND     |          |
| O K         | 0.525 | 15.57  | 38715.95 | 0.12  | 16.95  |          |
| V K         | 4.949 | 11.84  | 38336.18 | 0.12  | 4.05   |          |
| Ni K (Ref.) | 7.471 | 22.77  | 57608.79 | 0.19  | 6.76   |          |
| Total       |       | 100.00 |          |       | 100.00 |          |

**Figure S6.** EDX spectrum of NV/NRGO2.

**Table S2.** Elemental analysis of NV/NRGO2 by ICP-MS.

| Sample   | Ni      | V       | Ni : V (molar ratio) |
|----------|---------|---------|----------------------|
| NV/NRGO2 | 230 ppm | 125 ppm | 1.59                 |

**Table S3.** HER overpotentials ( $\eta$ ) at different current densities of Pt/C, NV, NRGO, NV/RGO, and NV/NRGO hybrids in 1.0 M KOH.

| Samples  | $\eta_{10}$<br>(mV) | $\eta_{50}$<br>(mV) | $\eta_{100}$<br>(mV) |
|----------|---------------------|---------------------|----------------------|
| Pt/C     | 16                  | 43                  | 59                   |
| NV       | 97                  | 140                 | 163                  |
| NRGO     | 194                 | 239                 | 259                  |
| NV/RGO   | 236                 | 304                 | 333                  |
| NV/NRGO1 | 94                  | 154                 | 187                  |
| NV/NRGO2 | 43                  | 97                  | 134                  |
| NV/NRGO3 | 81                  | 131                 | 160                  |

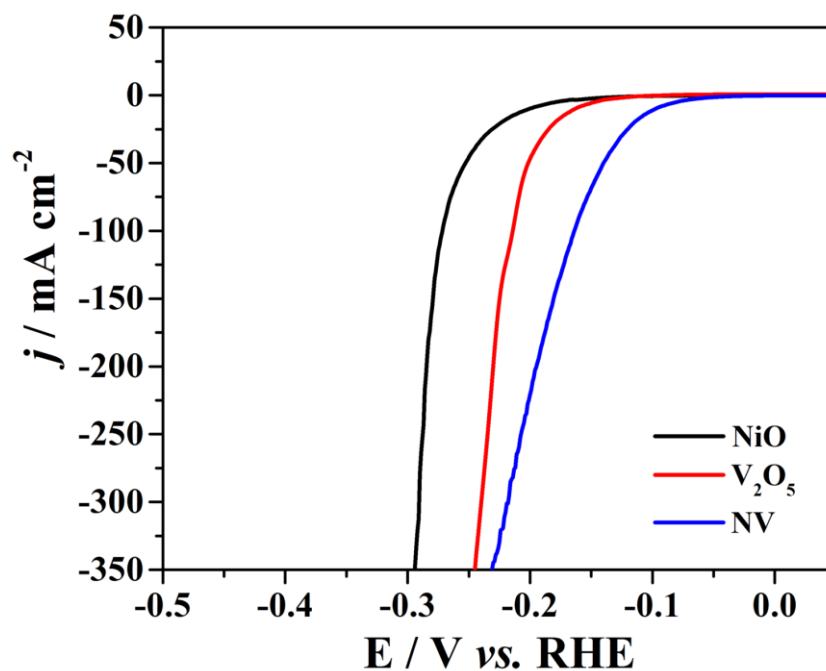

**Figure S7.** LSV polarization curves for HER at 5 mV s<sup>-1</sup> of NiO, V<sub>2</sub>O<sub>5</sub>, and NV in 1.0 M KOH with *iR*-correction.

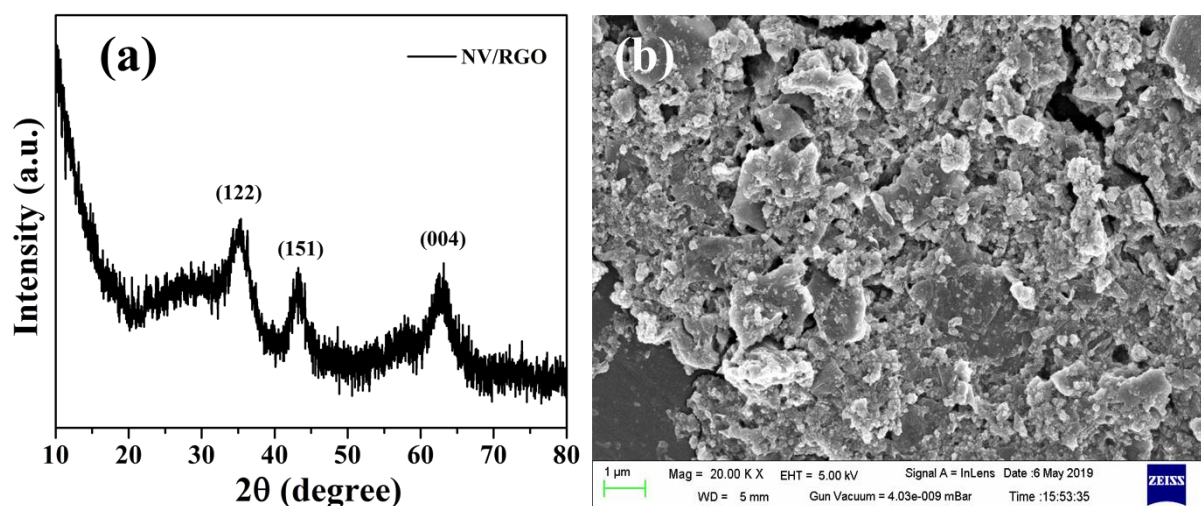

**Figure S8.** (a) XRD pattern and (b) FESEM image of NV/RGO.

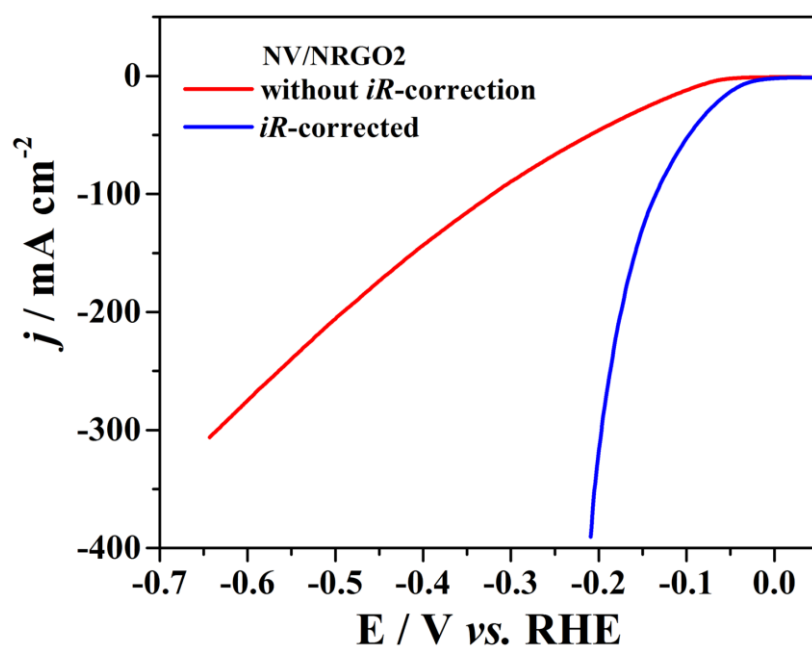

**Figure S9.** LSV curves of NV/NRGO2 at  $5 \text{ mV s}^{-1}$  with and without  $iR$ -correction.

### Turnover frequency (TOF) calculation

TOF ( $\text{s}^{-1}$ ) was calculated according to the equation as stated below:<sup>5</sup>

$$TOF = \frac{|j|S_{geo}}{2Fn}$$

where  $|j|$  is the current density ( $\text{A cm}^{-2}$ ),  $S_{geo}$  is the geometric surface area of the working electrode ( $\text{cm}^2$ ),  $\frac{1}{2}$  is used as HER involves 2 electrons per mole of  $\text{H}_2$ ,  $F$  is the Faraday constant ( $96485 \text{ C mol}^{-1}$ ), and  $n$  is number of active sites (mol) considering that all the metal atoms present in each sample are electrocatalytically active. In order to calculate number of active sites ( $n$ ), cyclic voltammograms (CV) were recorded  $-0.9$  to  $0.8 \text{ V}$  at  $10 \text{ mV s}^{-1}$  in  $1.0 \text{ M KOH}$ . The absolute components of the voltammetric charges (cathodic and anodic) during one CV cycle were measured. Subsequently, considering one electron redox process, this absolute charge was divided by two and then divided by the Faraday constant.<sup>6</sup>

### Equivalent circuit in Nyquist plot

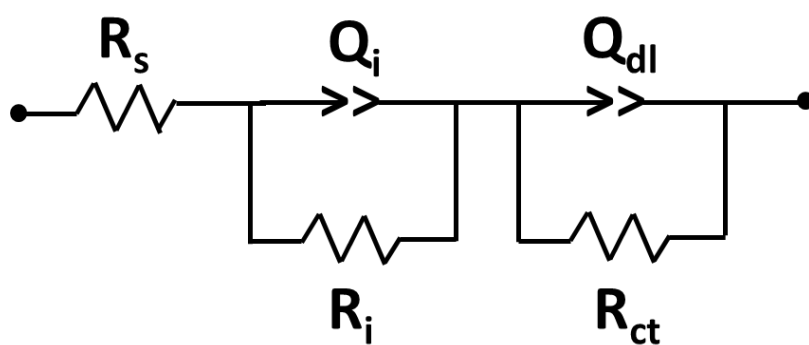

$R_s$  : Electrolyte resistance

$Q_i$  and  $R_i$  : Constant phase element and intrinsic/contact resistance of the catalyst respectively.

$Q_{dl}$  and  $R_{ct}$  : Constant phase element of double layer capacitor and charge transfer resistance at the catalyst–electrolyte interface respectively.



### Electrochemical active surface area (ECSA) calculation

The dependency of CV on scan rate ( $10\text{--}100\text{ mV sec}^{-1}$ ) of all samples is displayed in Figure S10. Subsequently, charging current ( $i_c$ ) was plotted against scan rate ( $\nu$ ) at the potential corresponding to  $0.156\text{ V}$  (Fig. S11a) and related to the following equation:<sup>7</sup>

$$i_c = \nu C_{dl}$$

The slope of the linear plots corresponds to electrochemical double layer capacitance ( $C_{dl}$ ) and related to electrochemical active surface area (ECSA) as:<sup>8,9</sup>

$$ECSA = C_{dl}/C_s$$

where  $C_s$  is the specific double-layer capacitance of a smooth catalyst surface and considered as  $0.04\text{ mF cm}^{-2}$  for all the prepared catalysts.<sup>8</sup>

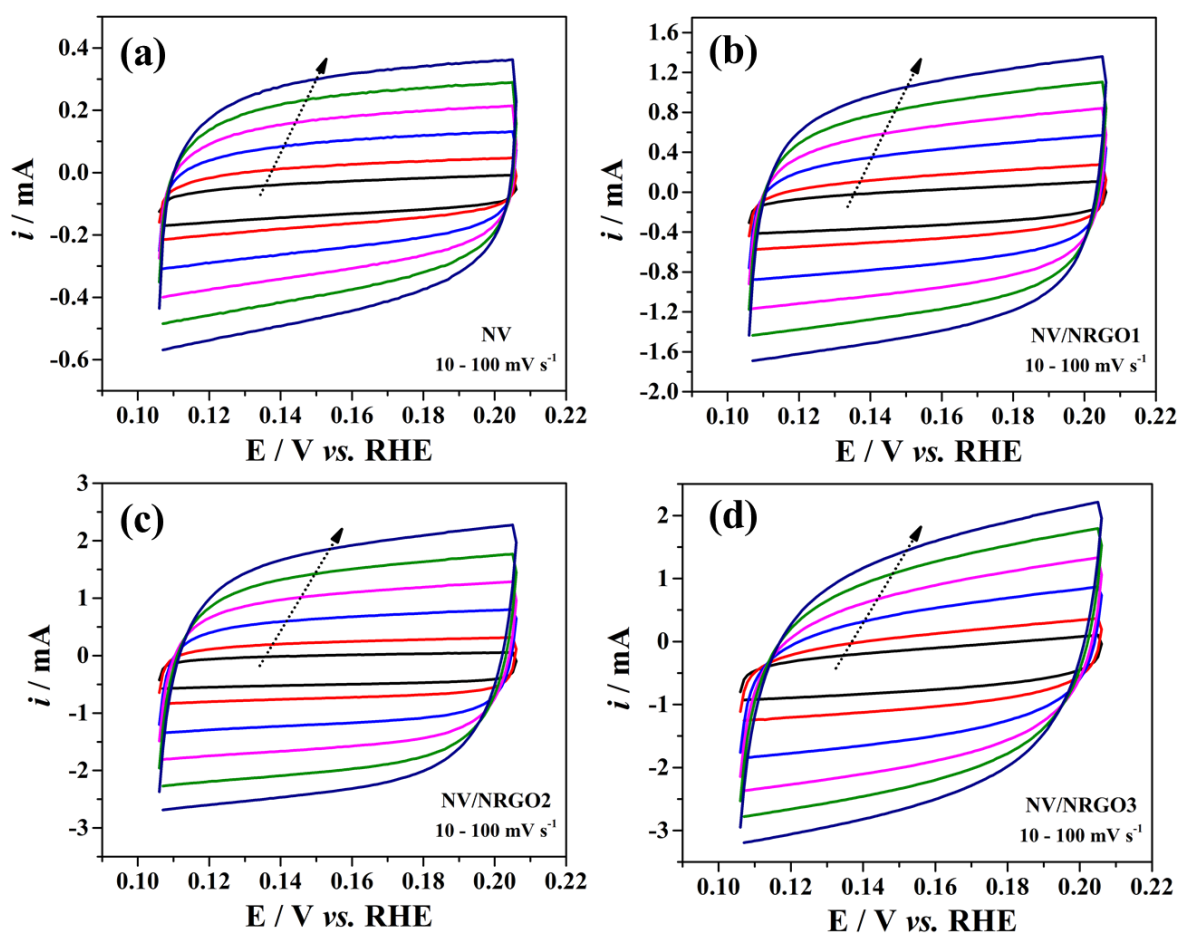

**Figure S10.** CV curves for  $C_{dl}$  at different scan rates ( $10 - 100\text{ mV s}^{-1}$ ) of (a) NV, (b) NV/NRGO1, (c) NV/NRGO2, and (d) NV/NRGO3, respectively.

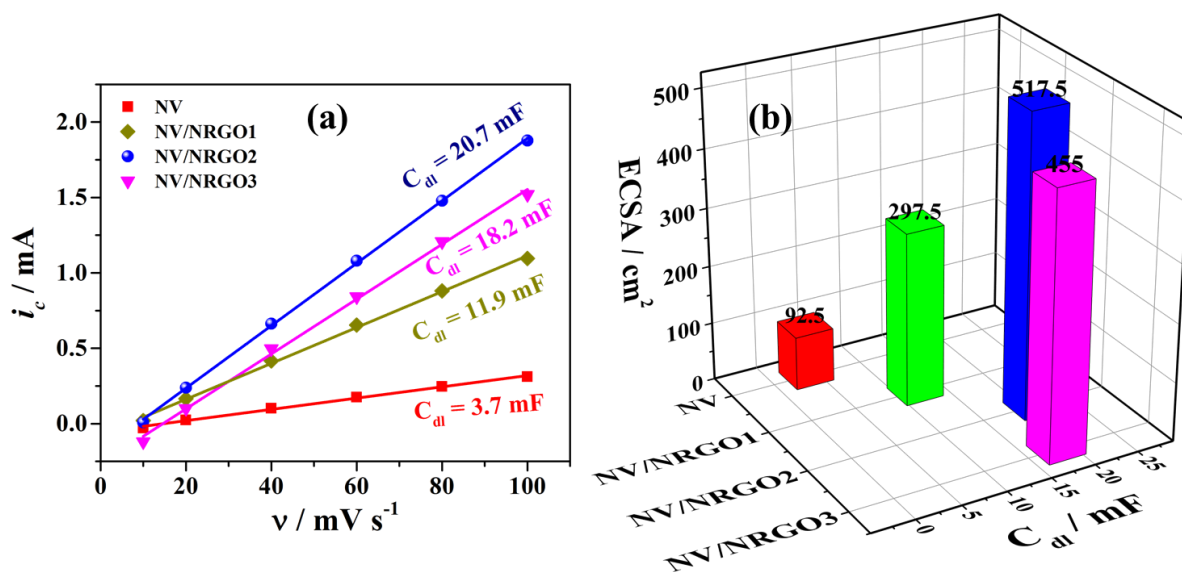

**Figure S11.** (a) Electrochemical double layer capacitance ( $C_{dl}$ ) at 0.156 V vs. RHE and (b) electrochemical active surface area (ECSA) of NV, NV/NRGO1, NV/NRGO2, and NV/NRGO3, respectively.



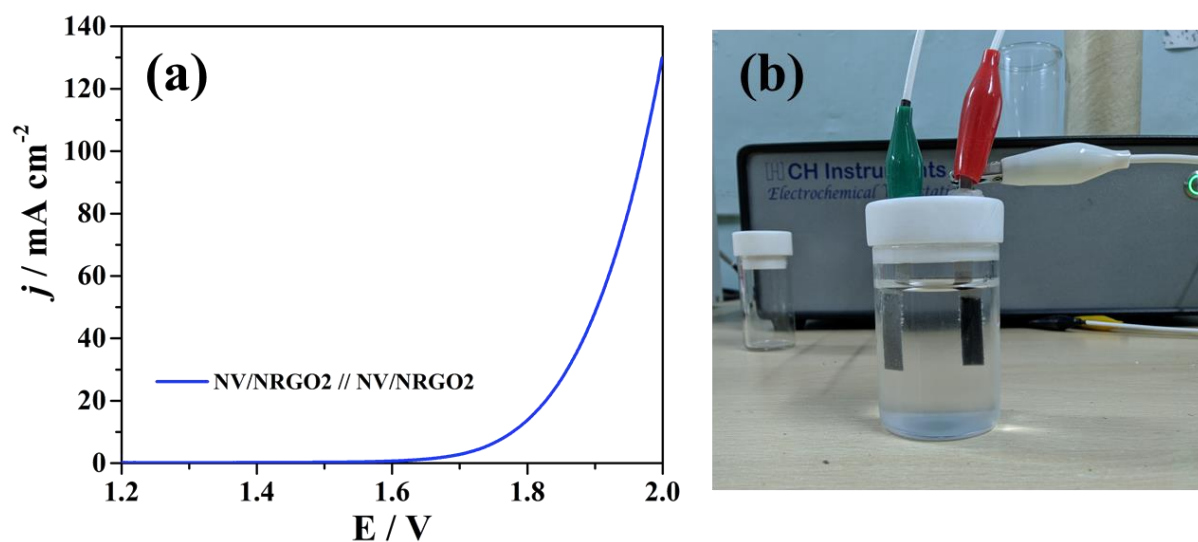

**Figure S12.** (a) Polarization curve and (b) digital image of two electrode configuration using NV/NRGO2 as both anode and cathode in 1.0 M KOH.

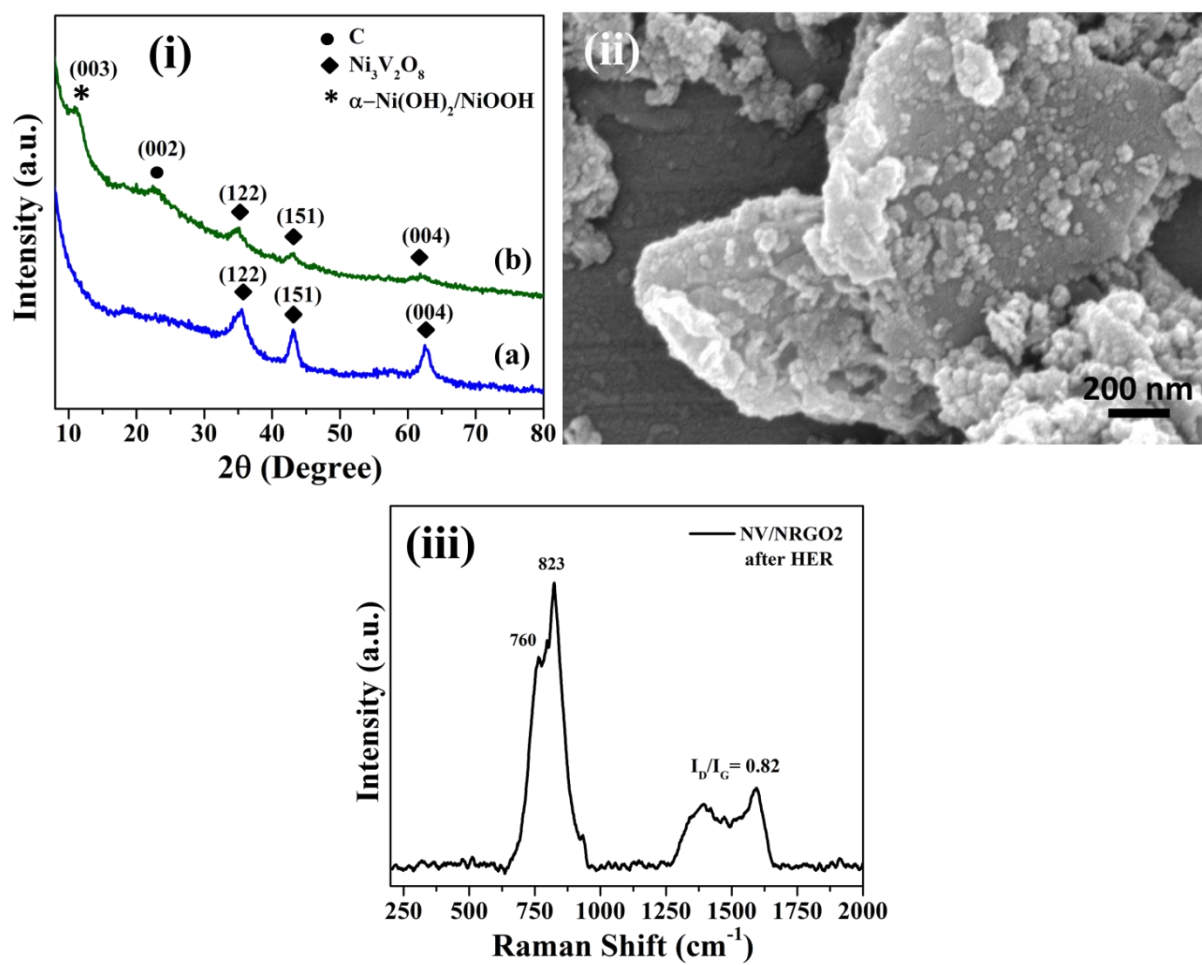

**Figure S13.** (i) XRD pattern of NV/NRGO2 before HER tests (a) and after durability tests (b). (ii) FESEM image and (iii) Raman spectrum of NV/NRGO2 after HER durability tests.

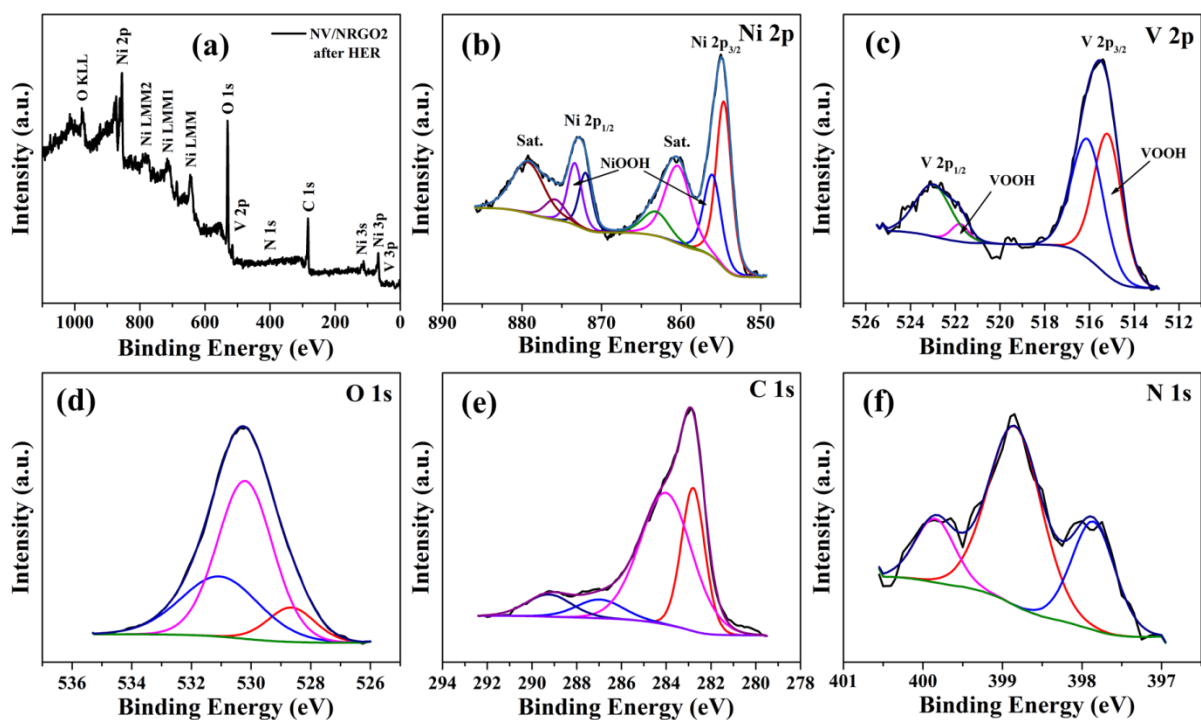

**Figure S14.** (a) XPS survey spectrum and high-resolution XPS spectra of (b) Ni 2p, (c) V 2p, (d) O 1s, (e) C 1s, and (f) N 1s regions of NV/NRGO2 after HER stability tests.

**Table S4.** Comparison of electrocatalytic HER activity in alkaline medium with few available literature.

| Catalyst                                                                              | Electrolyte      | $\eta_{10}$ (mV) | Tafel slope (mV dec <sup>-1</sup> ) | References       |
|---------------------------------------------------------------------------------------|------------------|------------------|-------------------------------------|------------------|
| P <sub>8.6</sub> -Co <sub>3</sub> O <sub>4</sub> /NF                                  | 1.0 M KOH        | 97               | 86                                  | 10               |
| Nest-like NiCoP                                                                       | 1.0 M KOH        | 62               | 68.2                                | 11               |
| Cu NDs/Ni <sub>3</sub> S <sub>2</sub> NTs-CFs                                         | 1.0 M KOH        | 128              | 76.2                                | 5                |
| Ni <sub>3</sub> N@CQDs                                                                | 1.0 M KOH        | 69               | 108                                 | 12               |
| Co(OH) <sub>2</sub> @PANI HNSs/NF                                                     | 1.0 M NaOH       | 88               | 91.6                                | 13               |
| N,P-Doped Mo <sub>2</sub> C@C Nanospheres                                             | 1.0 M KOH        | 47               | 71                                  | 14               |
| Mo <sub>2</sub> C/N-doped carbon microflowers                                         | 1.0 M KOH        | 100              | 65                                  | 15               |
| Fe <sub>17.5%</sub> -Ni <sub>3</sub> S <sub>2</sub> /NF                               | 1.0 M KOH        | 47               | 95                                  | 16               |
| Co <sub>3</sub> S <sub>4</sub> porous nanosheets                                      | 1.0 M KOH        | 63               | 58                                  | 17               |
| Ni <sub>3</sub> P MPs                                                                 | 1.0 M KOH        | 291              | 119                                 | 18               |
| Ni <sub>2</sub> P/Ni/NF                                                               | 1.0 M KOH        | 98               | 72                                  | 19               |
| Reduced NiCo <sub>2</sub> O <sub>4</sub>                                              | 1.0 M KOH        | 135              | 52                                  | 20               |
| Holey NiCoP NS                                                                        | 1.0 M KOH        | 58               | 57                                  | 21               |
| CoO <sub>x</sub> @CN                                                                  | 1.0 M KOH        | 232              | 115                                 | 22               |
| 2D MoS <sub>2</sub> confined Co(OH) <sub>2</sub>                                      | 1.0 M KOH        | 89               | 53                                  | 23               |
| Co <sub>2</sub> P@NPG                                                                 | 1.0 M KOH        | 165              | 96                                  | 24               |
| NiO/Ni-CNT                                                                            | 1.0 M KOH        | 80               | 82                                  | 25               |
| VOOH hollow nanospheres                                                               | 1.0 M KOH        | 164              | 104                                 | 26               |
| Ni <sub>3</sub> (VO <sub>4</sub> ) <sub>2</sub> @NiCo <sub>2</sub> O <sub>4</sub> /NF | 1.0 M KOH        | 113              | 101                                 | 8                |
| CoMoO <sub>4</sub> NWA/Ti                                                             | 1.0 M KOH        | 81               | 63                                  | 27               |
| Ni-Mn <sub>3</sub> O <sub>4</sub> /NF                                                 | 1.0 M KOH        | 91               | 110                                 | 28               |
| P-Co <sub>3</sub> O <sub>4</sub>                                                      | 1.0 M KOH        | 120              | 52                                  | 29               |
| NiCo <sub>2</sub> O <sub>4</sub> hollow microcuboids                                  | 1.0 M NaOH       | 110              | 49.7                                | 30               |
| NiFeO <sub>x</sub> /CFP                                                               | 1.0 M KOH        | 88               | 150.2                               | 31               |
| $\beta$ -Ni(OH) <sub>2</sub> /Pt                                                      | 1.0 M KOH        | 108              | 39                                  | 32               |
| Co <sub>3</sub> N plate                                                               | 1.0 M KOH        | 230              | 101.6                               | 33               |
| Ni <sub>3</sub> N/NF                                                                  | 1.0 M KOH        | 121              | 109                                 | 34               |
| Sr <sub>2</sub> RuO <sub>4</sub>                                                      | 1.0 M KOH        | 61               | 51                                  | 35               |
| Pt-Ni alloy                                                                           | 0.1 M KOH        | 82               | -                                   | 36               |
| N-Co-C/RGO                                                                            | 1.0 M KOH        | 130              | 77                                  | 37               |
| Ru-Ru <sub>2</sub> P@PC                                                               | 1.0 M KOH        | 43.4             | 35.1                                | 38               |
| Ni <sub>3</sub> N@VN-NF                                                               | 1.0 M KOH        | 56               | 47                                  | 39               |
| <b>Pt/C (20 wt.%)</b>                                                                 | <b>1.0 M KOH</b> | <b>16</b>        | <b>30.3</b>                         | <b>This work</b> |
| <b>Ni<sub>3</sub>V<sub>2</sub>O<sub>8</sub>/NRGO (5.6 wt.%)</b>                       | <b>1.0 M KOH</b> | <b>43</b>        | <b>54.8</b>                         | <b>This work</b> |

## References

- 1 D. C. Marcano, D. V. Kosynkin, J. M. Berlin, A. Sinitskii, Z. Sun, A. Slesarev, L. B. Alemany, W. Lu and J. M. Tour, *ACS Nano*, 2010, **4**, 4806–4814.
- 2 R. Kumar, P. K. Gupta, P. Rai and A. Sharma, *New J. Chem.*, 2018, **42**, 1243–1249.
- 3 R. Sahoo, A. Pal and T. Pal, *J. Mater. Chem. A*, 2016, **4**, 17440–17454.
- 4 S. Azizighannad and S. Mitra, *Sci. Rep.*, 2018, **8**, 10083.
- 5 J. X. Feng, J. Q. Wu, Y. Tong and G. R. Li, *J. Am. Chem. Soc.*, 2018, **140**, 610–617.
- 6 J. Zhang, T. Wang, P. Liu, Z. Liao, S. Liu, X. Zhuang, M. Chen, E. Zschech and X. Feng, *Nat. Commun.*, 2017, **8**, 1–8.
- 7 A. Karmakar and S. K. Srivastava, *ACS Appl. Mater. Interfaces*, 2017, **9**, 22378–22387.
- 8 X. Shang, J. Q. Chi, S. S. Lu, B. Dong, Z. Z. Liu, K. L. Yan, W. K. Gao, Y. M. Chai and C. G. Liu, *Electrochim. Acta*, 2017, **256**, 100–109.
- 9 A. Maiti and S. K. Srivastava, *J. Mater. Chem. A*, 2018, **6**, 19712–19726.
- 10 Z. Wang, H. Liu, R. Ge, X. Ren, J. Ren, D. Yang, L. Zhang and X. Sun, *ACS Catal.*, 2018, **8**, 2236–2241.
- 11 C. Du, L. Yang, F. Yang, G. Cheng and W. Luo, *ACS Catal.*, 2017, **7**, 4131–4137.
- 12 M. Zhou, Q. Weng, Z. I. Popov, Y. Yang, L. Y. Antipina, P. B. Sorokin, X. Wang, Y. Bando and D. Golberg, *ACS Nano*, 2018, **12**, 4148–4155.
- 13 J. X. Feng, L. X. Ding, S. H. Ye, X. J. He, H. Xu, Y. X. Tong and G. R. Li, *Adv. Mater.*, 2015, **27**, 7051–7057.
- 14 Y. Y. Chen, Y. Zhang, W. J. Jiang, X. Zhang, Z. Dai, L. J. Wan and J. S. Hu, *ACS Nano*, 2016, **10**, 8851–8860.
- 15 Y. Huang, Q. Gong, X. Song, K. Feng, K. Nie, F. Zhao, Y. Wang, M. Zeng, J. Zhong and Y. Li, *ACS Nano*, 2016, **10**, 11337–11343.
- 16 G. Zhang, Y. S. Feng, W. T. Lu, D. He, C. Y. Wang, Y. K. Li, X. Y. Wang and F. F. Cao, *ACS Catal.*, 2018, **8**, 5431–5441.
- 17 C. Zhang, Y. Shi, Y. Yu, Y. Du and B. Zhang, *ACS Catal.*, 2018, **8**, 8077–8083.
- 18 A. B. Laursen, R. B. Wexler, M. J. Whitaker, E. J. Izett, K. U. D. Calvinho, S. Hwang, R. Rucker, H. Wang, J. Li, E. Garfunkel, M. Greenblatt, A. M. Rappe and G. C. Dismukes, *ACS Catal.*, 2018, **8**, 4408–4419.
- 19 B. You, N. Jiang, M. Sheng, M. W. Bhushan and Y. Sun, *ACS Catal.*, 2016, **6**, 714–721.
- 20 S. Peng, F. Gong, L. Li, D. Yu, D. Ji, Z. Hu, Z. Zhang, S. Chou, T. Zhang, Y. Du and S. Ramakrishna, *J. Am. Chem. Soc.*, 2018, **140**, 13644–13653.

- 21 Z. Fang, L. Peng, Y. Qian, X. Zhang, Y. Xie, J. J. Cha and G. Yu, *J. Am. Chem. Soc.*, 2018, **140**, 5241–5247.
- 22 H. Jin, J. Wang, D. Su, Z. Wei, Z. Pang and Y. Wang, *J. Am. Chem. Soc.*, 2015, **137**, 2688–2694.
- 23 Y. Luo, X. Li, X. Cai, X. Zou, F. Kang, H.-M. Cheng and B. Liu, *ACS Nano*, 2018, **12**, 4565–4573.
- 24 M. Zhuang, X. Ou, Y. Dou, L. Zhang, Q. Zhang, R. Wu, Y. Ding, M. Shao and Z. Luo, *Nano Lett.*, 2016, **16**, 4691–4698.
- 25 M. Gong, W. Zhou, M. C. Tsai, J. Zhou, M. Guan, M. C. Lin, B. Zhang, Y. Hu, D. Y. Wang, J. Yang, S. J. Pennycook, B. J. Hwang and H. Dai, *Nat. Commun.*, 2014, **5**, 4695.
- 26 H. Shi, H. Liang, F. Ming and Z. Wang, *Angew. Chem., Int. Ed.*, 2017, **56**, 573–577.
- 27 J. Zhao, X. Ren, H. Ma, X. Sun, Y. Zhang, T. Yan, Q. Wei and D. Wu, *ACS Sustain. Chem. Eng.*, 2017, **5**, 10093–10098.
- 28 X. Li, P. F. Liu, L. Zhang, M. Y. Zu, Y. X. Yang and H. G. Yang, *Chem. Commun.*, 2016, **52**, 10566–10569.
- 29 S. Wang, Z. Xiao, Y. Wang, Y. C. Huang, Z. Wei, C. L. Dong, J. Ma, S. Shen and Y. Li, *Energy Environ. Sci.*, 2017, **10**, 2563–2569.
- 30 X. Gao, H. Zhang, Q. Li, X. Yu, Z. Hong, X. Zhang, C. Liang and Z. Lin, *Angew. Chem., Int. Ed.*, 2016, **55**, 6290–6294.
- 31 H. Wang, H. W. Lee, Y. Deng, Z. Lu, P. C. Hsu, Y. Liu, D. Lin and Y. Cui, *Nat. Commun.*, 2015, **6**, 7261.
- 32 X. Yu, J. Zhao, L. R. Zheng, Y. Tong, M. Zhang, G. Xu, C. Li, J. Ma and G. Shi, *ACS Energy Lett.*, 2018, **3**, 237–244.
- 33 Z. Xu, W. Li, Y. Yan, H. Wang, H. Zhu, M. Zhao, S. Yan and Z. Zou, *ACS Appl. Mater. Interfaces*, 2018, **10**, 22102–22109.
- 34 Z. Xing, Q. Li, D. Wang, X. Yang and X. Sun, *Electrochim. Acta*, 2016, **191**, 841–845.
- 35 Y. Zhu, H. A. Tahini, Z. Hu, J. Dai, Y. Chen, H. Sun, W. Zhou, M. Liu, S. C. Smith, H. Wang and Z. Shao, *Nat. Commun.*, 2019, **10**, 149.
- 36 C. Zhang, B. Chen, D. Mei and X. Liang, *J. Mater. Chem. A*, 2019, **7**, 5475–5481.
- 37 S. Palani, C. C. Liao, W. F. Chen, T. Chou, I. Shown, A. Sabbah, Y. G. Lin, J. F. Lee, M. K. Tsai, K. H. Chen and L. C. Chen, *J. Mater. Chem. A*, 2019, **7**, 7179–7185.
- 38 C. Wang, J. Li, S. Zhou, W. Cai, Z. Liu, J. Xiong, J. Liang, H. Cheng, Z. Yang and Z. Li, *J. Mater. Chem. A*, 2019, **7**, 5621–5625.
- 39 P. Zhou, B. Huang, P. Wang, X. Qin, D. Xing, X. Zhang, Y. Liu, Z. Wang, Z. Zheng and Y. Dai, *J. Mater. Chem. A*, 2019, **7**, 5513–5521.
